# Supplementary material for: Aguamiel concentrate from Agave salmiana and its extracted saponins attenuated obesity and hepatic steatosis and increased Akkermansia muciniphila in C57BL6 mice
Source: PubMed Central journal article supplement (PMC5039706; doi:10.1038/srep34242), 2016-09-28
Supplement: srep34242-s1.pdf [file srep34242-s1.pdf]

Supplementary information

**Title: Aguamiel concentrate from *Agave salmiana* and its extracted saponins attenuated obesity and hepatic steatosis and increased *Akkermansia muciniphila* in C57BL6 mice**

Ana María Leal-Díaz<sup>1</sup>, Lilia G. Noriega<sup>2</sup>, Ivan Torre-Villalvazo<sup>2</sup>, Nimbe Torres<sup>2</sup>, Gabriela Alemán-Escondrillas<sup>2</sup>, Patricia Lopez-Romero<sup>2</sup>, Monica Sanchez-Tapia<sup>2</sup>, Miriam Aguilar-López<sup>2</sup>, Janette Furuzawa-Carballeda<sup>3</sup>, Laura A. Velázquez-Villegas<sup>2</sup>, Azalia Avila-Nava<sup>2</sup>, Guillermo Ordáz<sup>2</sup>, Janet A. Gutierrez-Uribe<sup>1</sup>, Sergio O. Serna-Saldivar<sup>1</sup>, Armando R. Tovar\*<sup>2</sup>

<sup>1</sup> Centro de Biotecnología FEMSA, Tecnológico de Monterrey, 64849, Monterrey, NL, Mexico

<sup>2</sup> Departamento de Fisiología de la Nutrición, Instituto Nacional de Ciencias Médicas y Nutrición Salvador Zubirán, 14000, México D.F., Mexico

<sup>3</sup> Departamento de Inmunología y Reumatología, Instituto Nacional de Ciencias Médicas y Nutrición Salvador Zubirán, 14000, México D.F., Mexico

List of supplementary information

Page S3 - **Table S1.** Aguamiel concentrate nutritional information.

Page S4- **Figure S1.** Effect of aguamiel concentrate and its extracted saponins on the fecal crude fat.

Page S5- **Figure S2.** Aguamiel saponin extract decreased obesity and hyperglycemia in diet-induced obese C57BL6 mice.

Page S6- **Figure S3.** Positive correlation of the liver triacylglycerides (TAG) and the enzyme alanine aminotransaminase (ALT).

Page S7- **Figure S4.** Effect of aguamiel concentrate (AC) and its saponin extract on the retroperitoneal adipose tissue of mice fed a high-fat diet.

Page S8- **Figure S5.** Effect of the diet on the relative abundances of the gut microbiota at the family level.

Page S9- **Figure S6.** Effect of the diet on the relative abundances Akkermansia muciniphila measured by qRTPCR.

Page S10- **Method.** Butanolic crude saponin extraction.

Page S12- **Table S2.** Experimental diet composition offered to C57BL/6 mice during 12 weeks.

Page S14- **Table S3.** Primer sequence used to analyze the liver gene expression.

Page S15- **Table S4.** 16S DNA primer sequence used to analyzed fecal microbiota.

**Table S1. Aguamiel concentrate nutritional information**

| <b>Analysis</b>                | <b>Content<br/>(g/100g AC)</b> | <b>Method</b>                |
|--------------------------------|--------------------------------|------------------------------|
| <b>Minerals (g)</b>            | 10.61                          | NMX-F-607-NORMEX-2002        |
| <b>Dietary fiber</b>           | ND                             | NOM-086-SSA1-1994.AP.C7      |
| <b>Fat</b>                     | ND                             | NOM-086-SSA1-1994- AP.C1.1.3 |
| <b>Moisture</b>                | 40.84                          | NOM-116-SSA1-1994            |
| <b>Protein</b>                 | 2.25                           | NMX-F-608-NORMEX-2011        |
| <b>Available carbohydrates</b> | 46.28                          | Calculated by difference     |

**Figure S1. Effect of aguamiel concentrate and its extracted saponins on the fecal crude fat.** Fecal crude fat was quantified in a Goldfish equipment (Labconco Corporation, MO.) according to the AOAC 920.39 method.<sup>1</sup> Briefly, a pool of mice feces per treatment were dried at 60°C during 12 h. Following the samples (0.3g) were extracted with ether during 6 h. Afterwards, the solvent was evaporated and the crude fat weight was calculated based on the original sample weight. Statistical analysis was done with one-way ANOVA followed by Bonferroni *post hoc* test. Treatments with different letter (a>b) are significantly different at  $P<0.05$ . C: control; HF: High-fat; HFAC: High-fat with aguamiel concentrate; HFL: High-fat with low saponin dose; HFH: High-fat with high saponin dose.

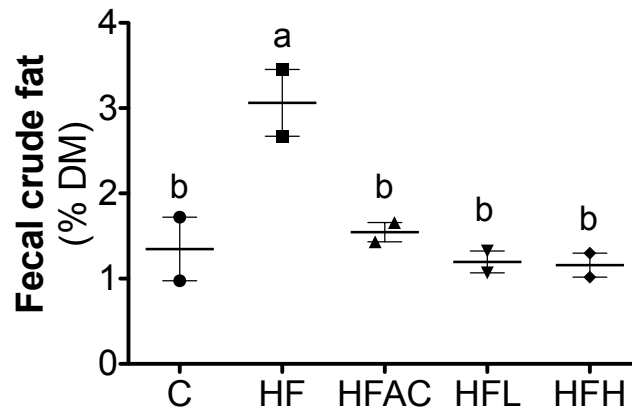

**Figure S2. Aguamiel saponin extract decreased obesity and hyperglycemia in diet-induced obese C57BL6 mice.** (A) Growth curve of mice fed the HF diet for 16 weeks and then switched to the HFH diet for another 8 weeks, (B) oral glucose tolerance test of mice fed the HF diet (OGTT1) and then switched to the HFH diet for 8 more weeks (OGTT2) and (C) their area under the curve (AUC) values. Data are presented as the mean  $\pm$  SEM (n=7). The statistical analysis in B was performed by a two-way ANOVA followed by the Bonferroni comparison test (\* $P < 0.05$ , \*\* $P < 0.01$ ). C: control; HF: High-fat; HFAC: High-fat with aguamiel concentrate; HFL: High-fat with low saponin dose; HFH: High-fat with high saponin dose.

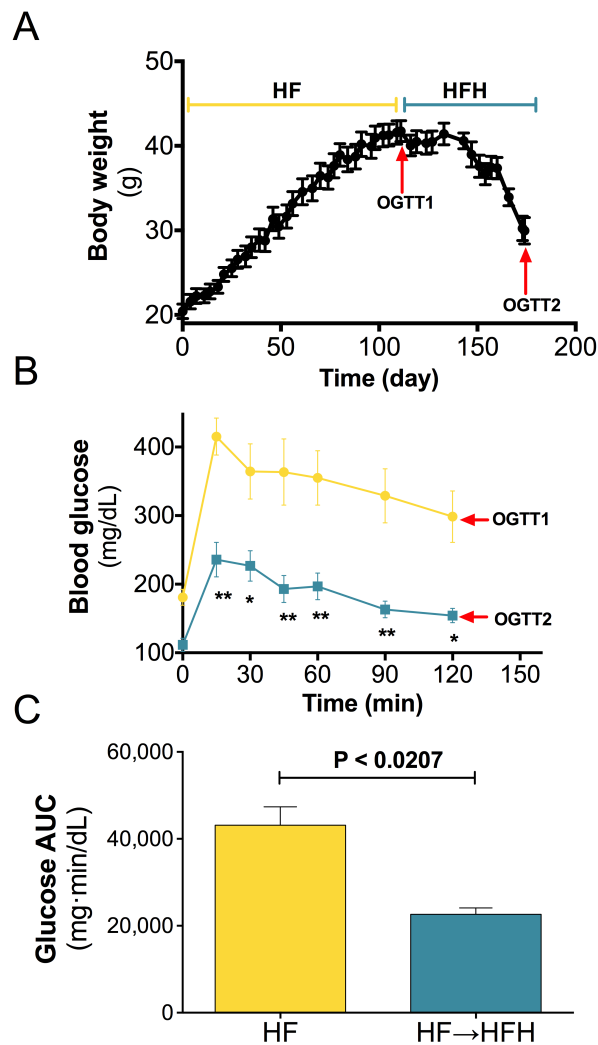

**Figure S3. Positive correlation of the liver triacylglycerides (TAG) and the plasma enzyme alanine amino transaminase (ALT).**

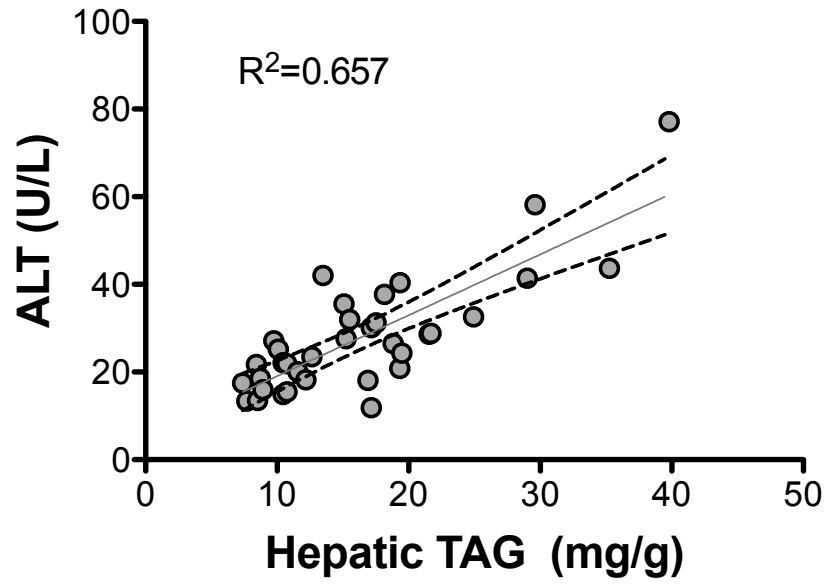

**Figure S4. Effect of aguamiel concentrate (AC) and its saponin extract on the retroperitoneal adipose tissue of mice fed a high-fat diet.** (A) Hematoxylin and eosin staining of retroperitoneal adipose tissue and (B) adipocyte size distribution. Statistical analysis was done with two-way ANOVA followed by Bonferroni *post hoc*. Mean values with different letters (a>b>c) at the same adipocyte size are significantly different (at least  $P<0.05$ ).

**A**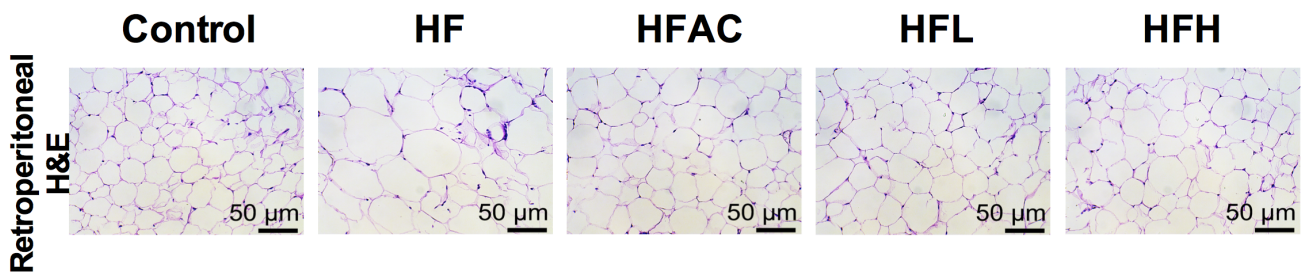**B**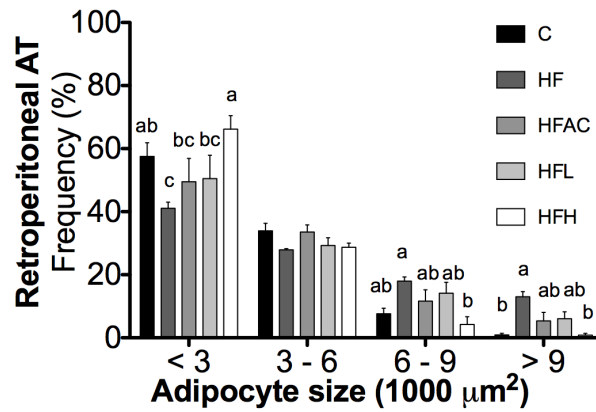

**Figure S5. Effect of the diet on the relative abundances of the gut microbiota at the family level.** C: control; HF: High-fat; HFAC: High-fat with aguamiel concentrate; HFL: High-fat with low saponin dose; HFH: High-fat with high saponin dose.

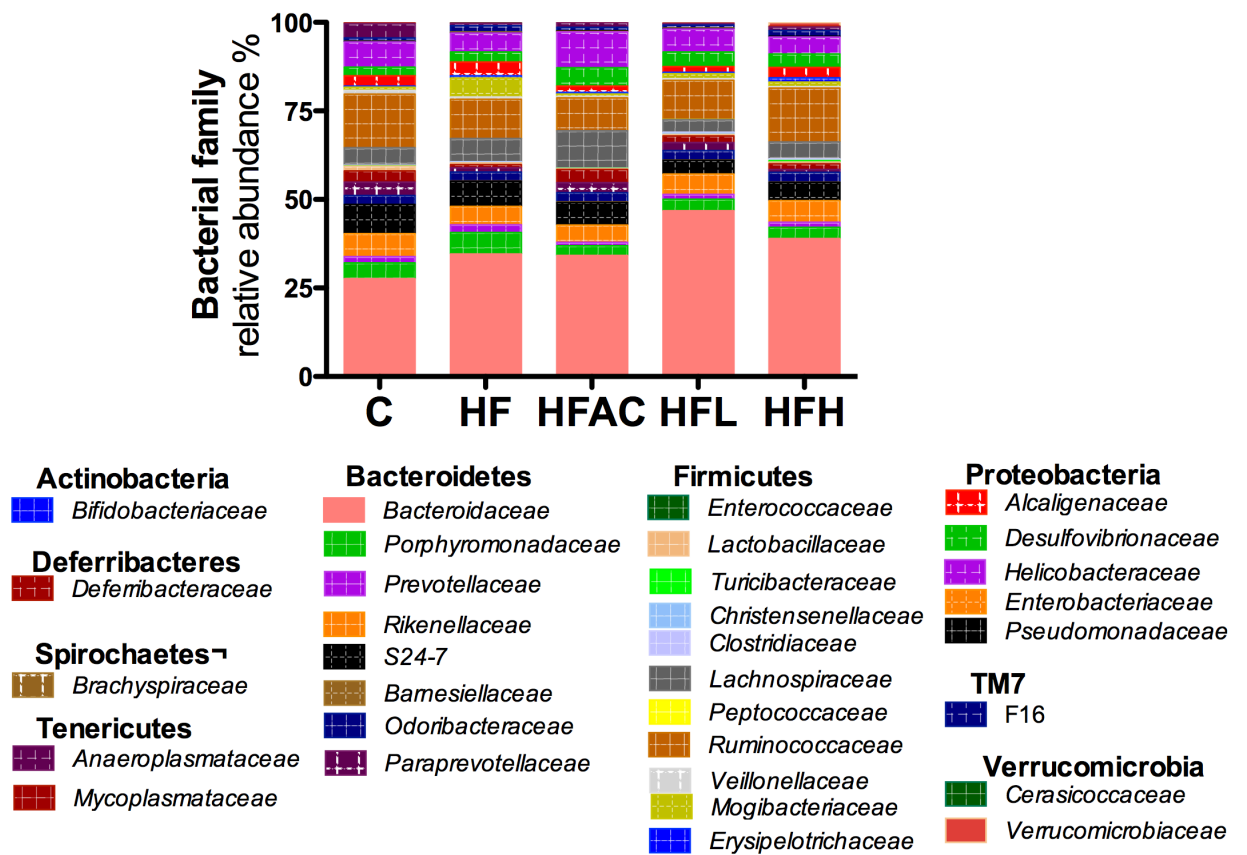



**Figure S6. Effect of the diet on the relative abundances *Akkermansia muciniphila* measured by qPCR.** C: control; HF: High-fat; HFAC: High-fat with aguamiel concentrate; HFL: High-fat with low saponin dose; HFH: High-fat with high saponin dose.

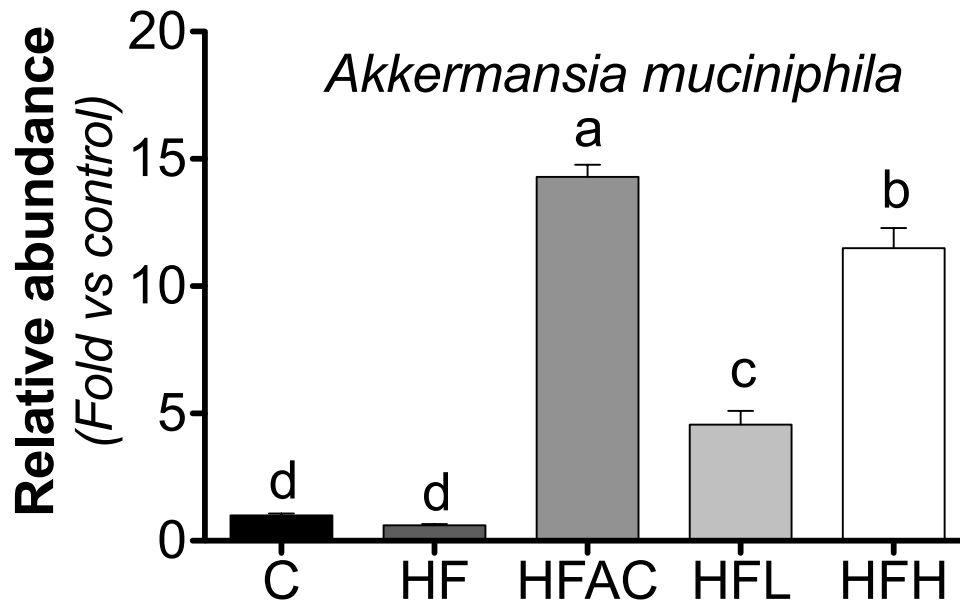

**Aguamiel concentrate sugar profiling method.**

The aguamiel concentrate (AC) was diluted 16-fold with distilled water. To eliminate any suspended particles, the dilution was centrifuged (Centrifuge 5804 R, Eppendorf, Hamburg, Germany) at 13,800g during 10 min at 4 °C. The supernatant was filtered through 0.22  $\mu$ m nylon membranes (VWR International LLC, Radnor, PA). Sugar concentrations were quantified using liquid chromatography with evaporative light scattering (HPLC-ELSD) detection (Agilent Technologies, 1200 Series, Santa Clara, CA). Sample (10  $\mu$ L) was separated in a Xbridge Amide column, 3.5  $\mu$ m, 4.6 x 250 mm, (Waters Corporation, Milford, MA) with mobile phase A: 80% acetonitrile (ACN) (BDH, Poole, UK) and 20 water (BDH, Poole, UK) with 0.2% triethylamine (Sigma-Aldrich, St. Louis, MO) and B: 30/70 ACN/water with 0.2% triethylamine, at a flow rate 1 mL/min, using the following gradient, starting at 10% B: 0→16 min, 70%B; 16.00→16.1 min, 10%B; 16.1→30 min, 10%B. Conditions for ELSD were: gain 2, pressure 2 bar, temperature 50°C, filter: 0.5 s and sampling 100-10 Hz. D-glucose (Sigma-Aldrich, St. Louis, MO), D-fructose (Merck KGaA, Darmstadt) and sucrose (Fluka, St. Louis, MO) were used as standards, in a range from 0.5 to 10 mg/mL for each sugar. Results are reported as % of sugars<sup>2</sup>.

**Butanolic crude saponin extract.**

To obtain the saponin crude extract, *n*-butanol-distilled water (1:1) with 10% of aguamiel concentrate w/v were agitated at 110 rpm during 2 h in 20L capacity agitated tank (Chemglass, Inc., Vineland NJ). The mixture was then rested for 6 h until the two phases were separated. The organic phase was centrifuged (3,000 g, 10 min and 25°C). The upper phase was collected and the lower phase was added to the remaining aqueous phase for a second extraction. In the second extraction, *n*-butanol was added in the same proportion as the remaining aqueous phase and followed the same procedure as the 1<sup>st</sup> extraction. The centrifuged upper phase was then concentrated in a 20 L rotary evaporator Rotavapor® R-220, (Büchi, Flawil, Switzerland) at 55°C, 70 rpm and vacuum from 120 to 60 bar. The residual dried extract was dissolved in ethanol 70% and concentrated in a 1 L rotary evaporator IKA RV 10 (IKA, Wilmington, NC) at 55°C, 70 rpm and vacuum from 120 to 60 bar. To validate and quantitate the saponin present in the crude extract, the dried extract dissolved in distilled water and filtered through a syringe filter, pore size 0.45 µm made of hydrophilic polypropylene from Pall Life Science (Ann Arbor, MI). Identification was done with HPLC-MS-TOC-ESI+ and quantitation with HPLC ELDS as previously reported by Leal-Díaz (2015)<sup>3</sup>

**Table S2. Experimental diet composition offered to C57BL/6 mice during 12 weeks.**

| <b>Ingredient (g/Kg)</b>      | <b>C<sup>a</sup></b> | <b>HF<sup>b</sup></b> | <b>HFAC<sup>c</sup></b> | <b>HFL<sup>d</sup></b> | <b>HFH<sup>e</sup></b> |
|-------------------------------|----------------------|-----------------------|-------------------------|------------------------|------------------------|
| Corn starch                   | 397.5                | 247.7                 | 247.7                   | 247.7                  | 247.7                  |
| Casein ( $\geq 85\%$ protein) | 200                  | 245                   | 241.8                   | 245                    | 245                    |
| Maltodextrin                  | 132                  | 71.3                  | 71.3                    | 71.3                   | 71.3                   |
| Sucrose                       | 100                  | 100                   | 76.9                    | 100                    | 100                    |
| Soybean oil                   | 70                   | 73.5                  | 73.5                    | 73.5                   | 73.5                   |
| Cellulose                     | 50                   | 50                    | 50                      | 50                     | 50                     |
| Mineral Mix (AIN-93G)         | 35                   | 35                    | 35                      | 35                     | 35                     |
| Vitamin Mix (AIN-93G)         | 10                   | 10                    | 10                      | 10                     | 10                     |
| L-Cystine                     | 3                    | 3                     | 3                       | 3                      | 3                      |
| Choline bitartrate            | 2.5                  | 2.5                   | 2.5                     | 2.5                    | 2.5                    |
| Tert-butylhydroquinone (TBHQ) | 0.014                | 0.046                 | 0.046                   | 0.046                  | 0.046                  |
| Lard                          | -                    | 161.5                 | 161.5                   | 161.5                  | 161.5                  |
| Saponin rich extract (DM)     | -                    | -                     | -                       | 2.8                    | 28                     |
| Aguamiel concentrate          | -                    | -                     | 50                      | -                      | -                      |
| <b>% Energy (Kcal) from:</b>  |                      |                       |                         |                        |                        |
| Protein                       | 19                   | 19                    | 19                      | 19                     | 19                     |
| Fat                           | 16                   | 45                    | 45                      | 45                     | 45                     |
| Carbohydrates                 | 65                   | 36                    | 36                      | 36                     | 36                     |

**C**, Control diet based on AIN-93

**HF**, high-fat diet with 45% of the Kcal coming from fat.

**HFAC**, high-fat high saponin dose with 45% of the Kcal coming from fat and 5% aguamiel concentrate added. Nutrients coming from the AC were subtracted from the formula.

**HFL**, high-fat low saponin dose with 45% of the Kcal coming from fat and 2.8g of saponin rich extract with 60 mg saponins HE.

**HFH**, high-fat high saponin dose with 45% of the Kcal coming from fat and 28g of saponin rich extract with 600 mg saponins HE.

**Table S3. Primer sequence used to analyse the liver and subcutaneous adipose tissue gene expression.**

| <b>Gene</b>                    | <b>Reverse 5'→3'</b>  | <b>Forward 3'→5'</b>  |
|--------------------------------|-----------------------|-----------------------|
| <b>ABCA1</b>                   | GGGAAACAGCCCAGTCAGTA  | AGCCAGAAGGGAGTGTCAGA  |
| <b>ABCG5</b>                   | GAAGCCAAGCATCTCCTCTG  | GATGAGCCAACCACAGGACT  |
| <b>ABCG8</b>                   | ACGTCGAGTAGTGAGGCTCT  | CCTCTCAGGTGCCTTGTTTT  |
| <b>ACC</b>                     | GACTGTGCCTGGAACCTCTT  | GCCTCTTCCTGACAAACGAG  |
| <b>AOX</b>                     | CCACATATGACCCCAAGACC  | AGGCATGTAACCCGTAGCAC  |
| <b>CYP7A1</b>                  | TGGGCTGTGCTCTAAGTTC   | CTGTGTCCAAATGCCTTCGC  |
| <b>CPT-1</b>                   | AAGGTGCTGCTCTCCTACCA  | TCATCAGTGGCCTCACAGAC  |
| <b>FAS</b>                     | TACAACAGCCTCAGAGCGAC  | CAAAGGACCAAGCATTGCC   |
| <b>HMGCR</b>                   | GGATTGCCATTCCACGAGCT  | GGGTATTGCTGGCCTCTTCA  |
| <b>LDLr</b>                    | GAGCCATCTAGGCAATCTCG  | ATGAGTCCCCAGAGACATGC  |
| <b>PPAR<math>\alpha</math></b> | GCAGCTCGTACAGGTCATCA  | CTCTTCATCCCCAAGCGTAG  |
| <b>SCD-1</b>                   | TAGTCGAAGGGGAAGGTGTG  | TGCGATACTACTCTGGTGCTC |
| <b>SERBP1c</b>                 | AAGCGGATGTAGTCGATGGC  | AGACAAACTGCCCATCCACC  |
| <b>SERBP2</b>                  | GTCACGAGGCTTTGCACTTG  | GATGATCACCCCGACGTTCA  |
| <b>UCP1</b>                    | CTTTGCCTCACTCAGGATTGG | ACTGCCACACCTCCAGTCATT |
| <b>TBX1</b>                    | TGAGGAGACACGCTTCACTG  | CTGCAGCGTCTTTGTCTGAG  |
| <b>Housekeeping</b>            | AGATTCGGGATATGCTGTTGG | AAAGCCTGGAAGAAGGAGGTC |
| <b>36B4</b>                    |                       |                       |

**Table S4. 16S ribosomal DNA primer sequence used in *Akkermansia muciniphila* qPCR analysis.**

| <b>Gene</b>                    | <b>Forward 3'→5'</b> | <b>Reverse 5'→3'</b> |
|--------------------------------|----------------------|----------------------|
| <i>Akkermansia muciniphila</i> | CCTTGCGGTTGGCTTCAGAT | CAGCACGTGAAGGTGGGGAC |
| <b>Universal primer</b>        | CTCACRRCACGAGCTGAC   | AAACTCAAAGAATTGACGG  |
